# Supplementary material
Source: MDPI journal article supplement (https://www.mdpi.com/2076-3417/11/2/706)
Supplement: s1 [file s1]

1 **Table S1.** Section of the questionnaire about oral health knowledge.

|                                                             |                                                                                                                                               |
|-------------------------------------------------------------|-----------------------------------------------------------------------------------------------------------------------------------------------|
| 1. How many milk teeth do we have?                          | 10<br>20<br>32                                                                                                                                |
| 2. How many permanent teeth do we have?                     | 20<br>28<br>32                                                                                                                                |
| 3. What are the most common diseases affecting oral cavity? | Dental caries and periodontal disease<br>Asthma and common cold<br>Herpes Simplex infection                                                   |
| 4. What is the reason for bleeding gums?                    | Not cleaning regularly and deposition of debris<br>Eating hard food<br>The use of soft picks                                                  |
| 5. What is fluoride?                                        | A substance that purifies water<br>A substance that improves taste of food<br>A chemical substance in water that prevent dental caries        |
| 6. Tooth plaque:                                            | Contains bacteria which damages enamel and gums<br>Is sticky, colorless film that protects teeth and gums<br>Can't be removed with toothbrush |
| 7. Tartar:                                                  | Can be removed with ultrasonic scaling<br>Can be removed with interproximal floss<br>Can be removed with the toothbrush                       |
| 8. Deciduous (or milk) teeth:                               | Can be affected by caries<br>Can't be affected by caries<br>Can be affected by caries but does not need to be cured                           |

2

3

4

5

6

7

**Table S2.** Section of the questionnaire about oral health practices.

|                                             |                                                                                                          |
|---------------------------------------------|----------------------------------------------------------------------------------------------------------|
| 1. How do you clean your teeth?             | Toothbrush only<br>Dental floss only<br>Both                                                             |
| 2. How often do you clean your teeth?       | Occasionally<br>Twice or more daily<br>Once daily                                                        |
| 3. How long do you brush your teeth?        | 30 seconds<br>1 minute<br>2 ore more minutes                                                             |
| 4. Do you rinse your mouth after meals?     | Yes, after each meal<br>Yes, after some meals<br>No                                                      |
| 5. How do you brush your teeth?             | I am not focused in the movements I do<br>Horizontal movement<br>Vertical/circular movement              |
| 6. Where do you brush your teeth?           | Only the outer surfaces<br>The outer, the inner and occlusal surfaces<br>Only occlusal part of the crown |
| 7. How often do you change your toothbrush? | After 1-2 months<br>After more than 2 months<br>When bristles flare out                                  |
| 8. Do you clean your tongue?                | Yes<br>No<br>Sometimes                                                                                   |

**Table S3.** Section of the questionnaire about dietary habits.

- |                                                            |                                                                                                             |
|------------------------------------------------------------|-------------------------------------------------------------------------------------------------------------|
| 1. How many times a day do you eat during the day?         | 3 times (Breakfast/lunch/dinner)<br>Between 3 and 5 times<br>Each time I feel hungry (more than five times) |
| 2. Do you snack between meals?                             | Never<br>Occasionally (1-2 times per week)<br>Regularly (each day)                                          |
| 3. How often do you eat snack between meals?               | Once a day<br>Twice a day<br>More than twice a day                                                          |
| 4. What type of snacks do you eat between meals?           | Cakes/sweets<br>Fruit/yogurt<br>Crackers/sandwiches                                                         |
| 5. How often do you consume milk and milk products?        | Never<br>Occasionally<br>Regularly                                                                          |
| 6. How often do you eat fruit and vegetables?              | Never<br>Occasionally<br>Regularly                                                                          |
| 7. How often do you eat fast food?                         | Never<br>Occasionally<br>Regularly                                                                          |
| 8. How often do you drink soft drinks (Coke, fruit juice)? | Never<br>Occasionally<br>Regularly                                                                          |
